28 the rigidity of ESCRT-III filaments through the assembly of multi-strands triggers buckling of  
29 the membrane.

30

### 31 **One Sentence Summary:**

32 ESCRT-III heteropolymers deform membranes into helical tubes.

33

### 34 **Main Text:**

35 The Endosomal Sorting Complexes Required for Transport (ESCRT)-III proteins are an  
36 evolutionarily ancient family of proteins that execute membrane scission in different cellular  
37 contexts (reviewed in (1)). ESCRT-III can polymerize into rings and spirals in solution (2-4) or  
38 on membrane substrates (5, 6). When single or several ESCRT-III proteins are incubated with  
39 model membranes *in vitro* or over-expressed in cells, they deform membranes into straight and  
40 conical tubes (6, 7), exemplified in most detail by the formation of tubules by CHMP1B alone  
41 and in complex with IST1 (6). Similar but inverted conical structures are also observed *in vivo*  
42 by overexpression of CHMP4A/B (7) and at the neck of budding Gag envelopes (8).  
43 Mechanistically, we have previously shown that flat spirals formed on lipid membranes from  
44 the ESCRT-III protein Snf7 can accumulate elastic energy and that this energy can be channeled  
45 to shape a flat membrane into a tube through a buckling transition (5, 9). The highly flexible  
46 Snf7 polymer alone is unable to deform the membrane because its interaction with the lipid  
47 surface is stronger than its tendency to transition from a flat spiral into a helical polymer. Hence,  
48 Snf7 spirals fail to deform artificial membranes *in vitro* (5). The addition of Vps24/Vps2 to  
49 Snf7 flat spirals may trigger the buckling shape transition, however, because they form helical  
50 polymers together (3, 10). We and others have previously shown that the addition of  
51 Vps24/Vps2 leads to the formation a second, parallel strand next to the Snf7 filament (10, 11).  
52 Thus, buckling may be triggered by the formation of the composite polymer. In this model,  
53 assembly of the second strand increases the energy cost of the flat spiral conformation and favor  
54 buckling into an energetically preferred helical conformation. However, the shape transition  
55 from a flat spiral into a cylindrical helix implies that the filament-membrane or intra-filament  
56 interactions are altered (12). We set out to determine how yeast Snf7, Vps24, and Vps2 co-  
57 assemble multi-stranded polymers capable of deforming lipid bilayers *in vitro*.

58 To liposomes incubated with recombinant Snf7 and decorated by flat Snf7 spirals (5),  
59 we added recombinant Vps24 and Vps2 and incubated the mixture for several hours. Using

60 negative stain EM, we observed a mixture of vesicles decorated with flat spirals (Fig. 1A) (5,  
61 *11*) and helical tubes that were decorated with filamentous protein polymers (Fig. 1B, C). Cryo-  
62 EM of the flat spirals and the helical tubes confirmed that both structures were organized on  
63 the lipid membrane (Fig. 1D-F) and that the regularity of the helical tubes made them amenable  
64 to higher-resolution imaging. We thus focused on the helical, tubular membrane protrusions  
65 (Fig. 1B, C, E, F) and found that they only form in the presence of all three proteins (Fig. S1A-  
66 C). These helical lipid membrane tubes have an average diameter of  $23.9 \pm 3.7$  nm and are  
67 coiled into a helix with an outer diameter of  $82.3 \pm 6.1$  nm and a pitch of  $53.1 \pm 7.6$  nm (all  
68 values average  $\pm$  SD) (Fig. S1D-G). Their prevalence increased with incubation time, indicating  
69 thermodynamic stability.

70 A helical membrane tube is an unusual shape because it is energetically unfavorable due  
71 to the high membrane curvatures. Cylindrical stacks of lipid membranes have been reported to  
72 remodel into helical tubes in the presence of specific membrane-binding polymers, although  
73 the mechanism of the membrane remodeling was not elucidated (*13*). Helical polymers may  
74 stabilize helical membrane tubes by relying on a form of geometric “frustration” that arises  
75 when there is an incompatibility between the preferred direction of curvature of the helical  
76 polymer and the positioning of the membrane-binding proteins along its length (*14*). We  
77 hypothesize that a similar incompatibility determines the preferred helical morphology of tubes  
78 in our experiments. Indeed, since Snf7/Vps24/Vps2 form helical filaments, those filaments  
79 could wind around a straight tube, binding to it along the direction of their preferred curvature,  
80 such as BAR domain-containing protein-coated or dynamin-coated membrane tubes (*15*).  
81 Alternatively, they could force the tube to follow their helical path, in this case, being able to  
82 bind it in the direction perpendicular to their preferred curvature as well.

83 To visualize the ESCRT-III filament organization around the helical tubes, we  
84 performed cryogenic electron tomography (cryo-ET) on vitrified helical membrane tubes and  
85 used image filtering and manual segmentation on reconstructed tomographic volumes. All tubes  
86 appeared as left-handed helices, though we cannot confirm this is the handedness without a  
87 chiral internal standard. On the surface of the tubes, we observed six to eight filaments parallel  
88 to the tube axis forming multi-stranded bundles (Fig. 1G-I, Fig. S1H-J, Movies S1-S2). The  
89 filaments are almost always excluded from the inside of the tube helix and have the same  
90 thickness as negatively stained, double-stranded Snf7/Vps24/Vps2 heteropolymers ( $4.9 \pm 0.5$   
91 nm; average  $\pm$  SD) (*11*).

## LUVs + Snf7 + Vps2 + Vps24

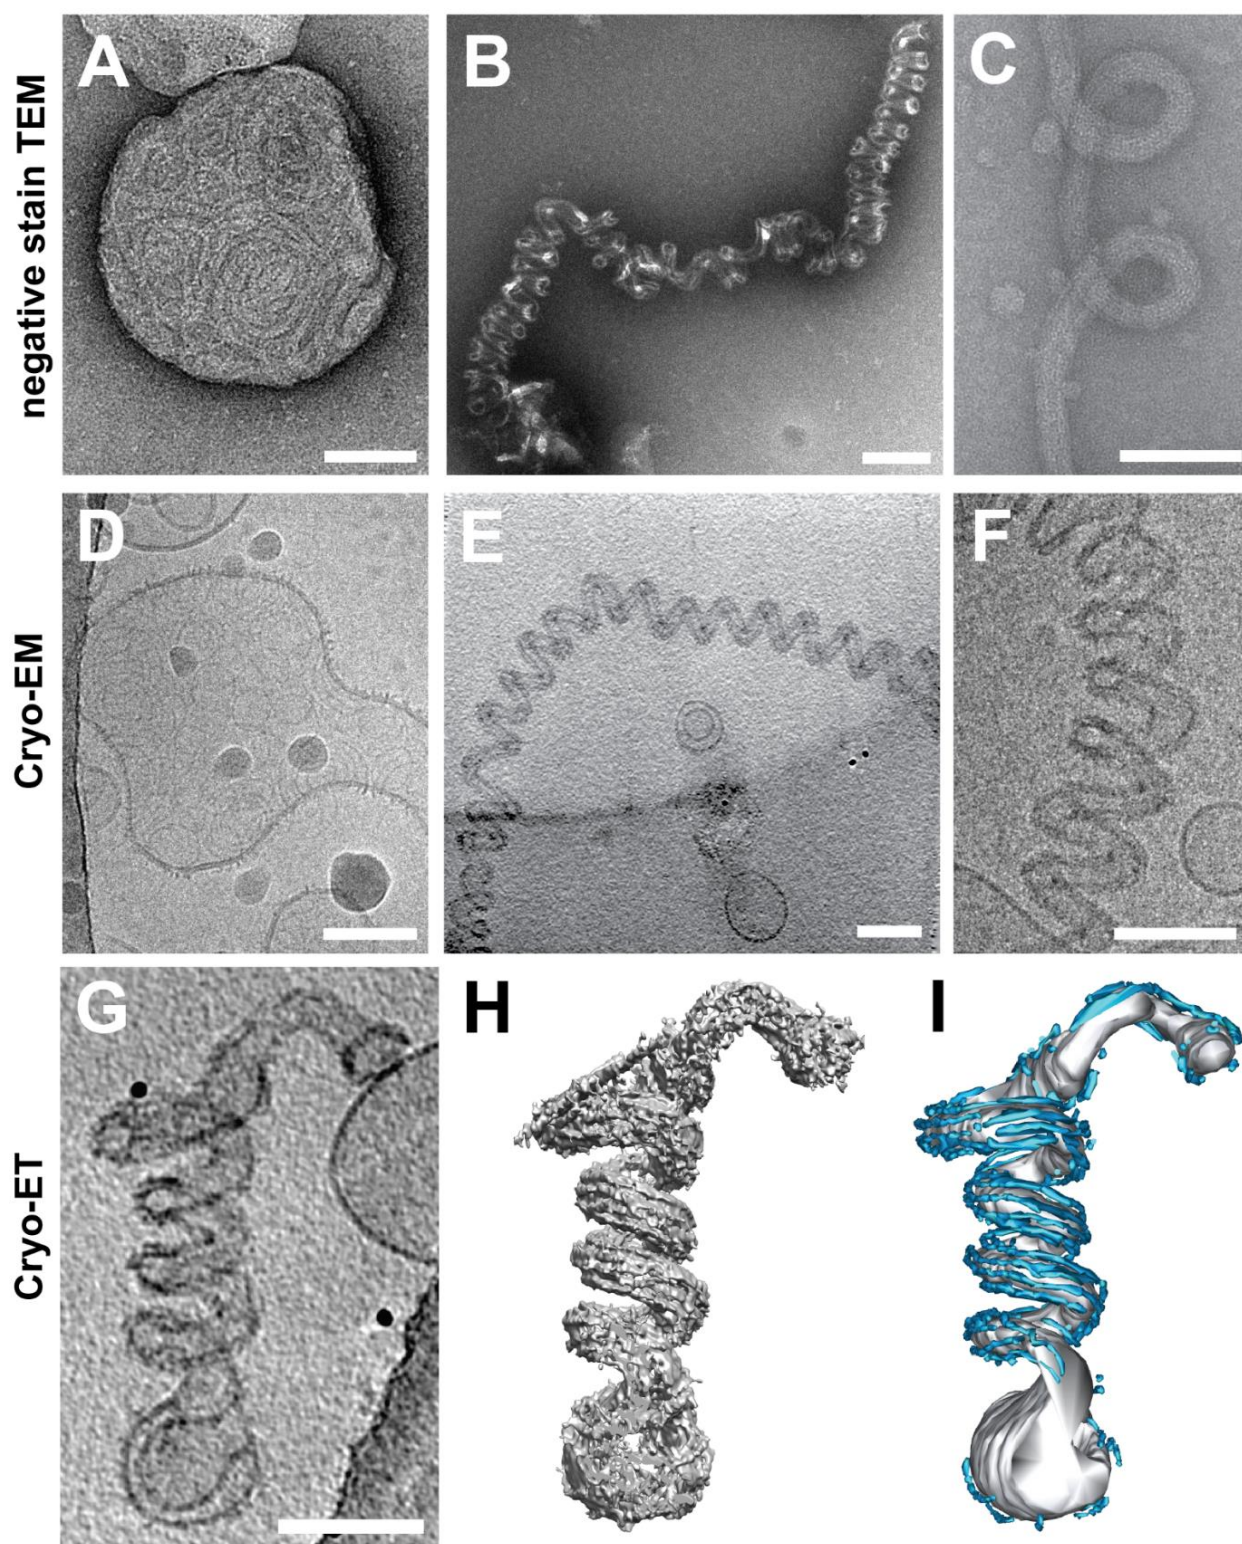

92

93

94 **Fig. 1: Helical tubulation of liposomes by ESCRT-III heteropolymers.** Electron  
95 micrographs showing undeformed liposomes (A, D) and helical membrane tubes (B, C, E, F)  
96 decorated with Snf7/Vps24/Vps2 on negatively stained (A-C) and vitrified (D-F) samples. The  
97 reconstructed cryo-ET volume of a helical membrane tube projected in Z (G) and volume view  
98 after filtering (H) or manual segmentation (I) showing the organization of protein filaments  
99 (cyan) along the helical membrane tube axis (grey). All scale bars 100 nm.

100



101 To obtain a more detailed view of the filament organization, we performed  
102 subtomogram averaging (STA) on slices along the helical tube axis. The variability in tube  
103 dimensions in the dataset made it impossible to resolve the entire helical tube. We, therefore,  
104 focused on the filaments on the outer tube surface and obtained a reconstruction at 32 Å  
105 resolution (Fig. 2). This map revealed that the filaments cluster in three separate regions with  
106 two clearly defined grooves between them (Fig. 2A, Fig. S2A). The central cluster, containing  
107 two filaments, covered a 13 nm wide region around the equator of the tube (equatorial filaments,  
108 blue). Two additional filament clusters, each containing 2-3 filaments, are shifted up and down  
109 from the equator, respectively, (polar filaments, red) and appeared wider (16-20 nm) (Fig. 2B-  
110 D). The resolution of the shifted, polar filaments was limited as their positions varied more with  
111 tube diameter compared to the equatorial region.

112 With further STA focused on the equatorial cluster, we reconstructed a map of this area  
113 (32 Å resolution), revealing that the two equatorial filaments contain two strands each (Fig. 2E-  
114 G, Fig. S2B). The filaments bundle in a plane parallel to the tube's helical axis and their  
115 membrane binding area is on the bundle's inside, also parallel to the helical axis, as observed  
116 in previously described ESCRT-III heteropolymers (6). Yet, in our case, both strands appear to  
117 be interacting with the membrane. The filaments in the polar clusters, based on their thickness,  
118 could be double-stranded as well, though our reconstructions were unable to resolve the  
119 substructure directly. In contrast to the equatorial filaments, however, the bundling plane of the  
120 polar filament strands is perpendicular to the helical axis, as is its membrane-binding interface  
121 (Fig. 2H). This orientation fits the double-stranded spirals formed by Snf7/Vps24/Vps2 on flat  
122 bilayers (11). Overall, the architectures of equatorial and polar filaments appear to be similar:  
123 both are composed of at least two double-stranded filaments, bundled together as a helical  
124 ribbon along the surface of the tube. However, the geometry of the helical tube makes it  
125 impossible that all filaments have the same path and bind the membrane with the same interface  
126 (Fig. 2H). For the same reasons, interactions between filaments within a bundle cannot be the  
127 same in polar filaments and equatorial filaments. While the possibility that ESCRT-III  
128 molecules bind their target membranes with two different orientations seems *a priori*  
129 unexpected, existing structural studies have reported different membrane binding interfaces for  
130 Snf7 versus CHMP1B (6, 16).

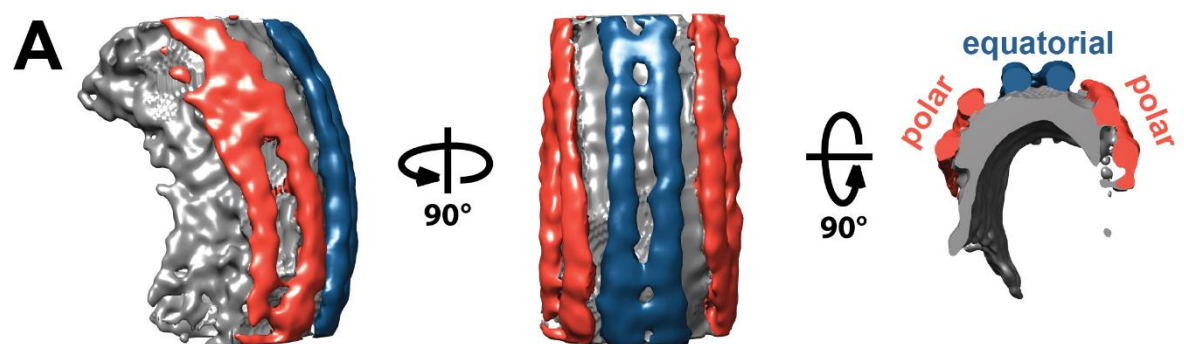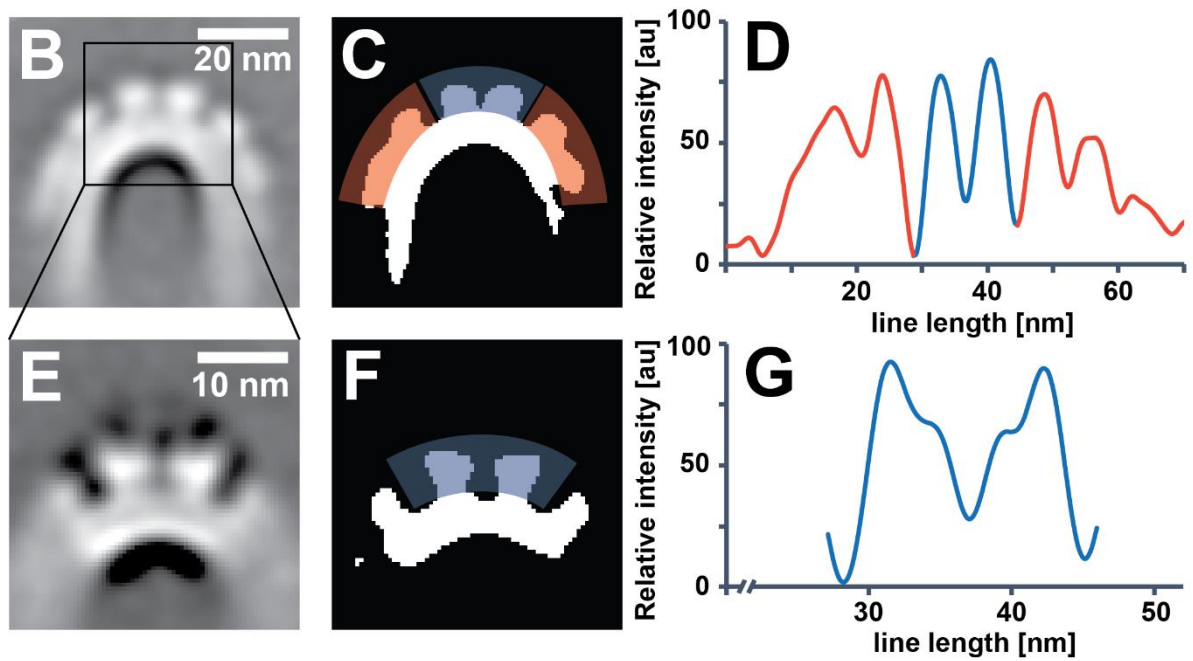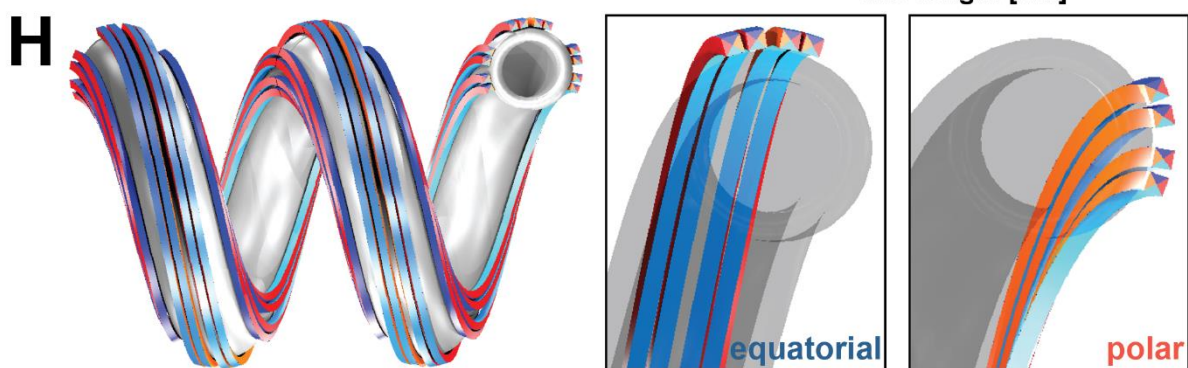

133 **Fig. 2: ESCRT-III filament bundles form distinct clusters on the surface of helical tubes.**  
134 (A) Side view (left), top view (center) and cross-section (right) of a global subtomogram  
135 average showing filaments following the tube axis, in the equatorial (blue) and polar (red)  
136 binding mode, respectively. (B) Sum projection of a central segment of the tube in (A) showing  
137 filaments on the outer surface of the helical tube, organized as one equatorial and two polar  
138 clusters. Scale bar 20 nm. (C) Equatorial (blue) and polar (red) filament cluster highlighted on  
139 the thresholded image (B). (D) Intensity profile of protein density in (C). (E) Projection of a  
140 refined map of the equatorial cluster showing that both filaments of the cluster are made of two  
141 strands each. Scale bar 10 nm. (F) Thresholded image of (E). (G) Intensity profile of protein  
142 density in (E). (H) 3D model of one equatorial and two polar filament bundles, each formed  
143 from two double-strands, on a helical membrane tube (grey). All filaments are identical, except  
144 that equatorial and polar filaments bind the membrane through the cyan and orange interfaces,  
145 respectively (insets). Filaments in the two hemispheres are shown as antiparallel.  
146



147 To clarify the interplay between the elasticity of the ESCRT-III filaments and that of  
148 the membrane in determining the shape of the helical tube, we sought to analyze the  
149 spontaneous shape of ESCRT-III filaments without a helical membrane tube for higher-  
150 resolution imaging. By growing Snf7/Vps24/Vps2 filaments in the presence of detergent-  
151 solubilized lipids, helical ribbons formed without membrane tubes during detergent removal  
152 (Fig. S3A-C). Most of these tube-less, helical ribbons assembled into sharp zigzag shapes (Fig.  
153 3A, red arrows in Fig S3A-C), a smaller population appeared sinusoidal (Fig. 3B, blue arrows  
154 in Fig S3A-C), and a third ribbon population displayed significantly larger ribbons with varying  
155 strand numbers and diameters (Fig. 3C, yellow arrows in Fig. S3A-C). We used single-particle  
156 averaging approaches to analyze these tube-less helical protein filament ribbons and determined  
157 2D class averages (Fig. 3D-F). The overall appearance of these sinusoidal ribbons suggests they  
158 comprise multi-stranded filaments that could orient along a helical path similar to that of the  
159 equatorial filaments we observe bound to the helical membrane tubes (Fig. 3E).

160 Analysis of the more ordered “zigzag” structure (Fig. 3A, D) led to a 3D reconstruction  
161 at 15 Å resolution. This structure revealed a helical ramp formed around a membrane bicelle, a  
162 tension-less lipid bilayer stabilized by detergents, with the bicelle plane oriented perpendicular  
163 to the helix axis. On both sides of the bicelle, we observed filamentous polymers with  
164 dimensions consistent with other double-stranded ESCRT-III structures (6, 10, 11).  
165 Considering the apparent subunit tilt on both sides of the bicelle, these appear to be anti-parallel  
166 to each other (Fig. 3D, G).

167 We confirmed the anti-parallel orientation of the two polymers by a 3D reconstruction  
168 at a higher resolution (11 Å) that was computed by focusing on one side of the bicelle only (Fig.  
169 3H). The subunits appear to polymerize like previously described ESCRT-III heteropolymers  
170 and were oriented along a similar helical path. Surprisingly, both strands appear to interact with  
171 the membrane, and their membrane-binding interface is oriented perpendicular to the main  
172 helical axis (Fig. 3H). The interface is therefore perpendicular to that postulated for CHMP1B,  
173 which is parallel to the helix axis (6). Molecular docking allows fitting both filaments with  
174 crystal structures of subunits in the open (*D. melanogaster* CHMP4B homolog Shrub, PDB  
175 5J45 (17); yeast Snf7, PDB 5FD9 (16)) and closed conformation (Human CHMP3; PDB 3FRT  
176 (18)), respectively (Fig. S3D), with inter-subunit connectivity similar to known ESCRT-III  
177 heteropolymer structures (6). The resolution of the map, however, did not allow us to discern  
178 unambiguous conformations for the subunits of either strand. Nevertheless, the zigzag tube-less  
179 ribbon’s architecture is compatible with the polar filaments on helical tubes, and confirm that  
180 the polar filaments of the helical tube are also double-stranded. Our results confirm that

181 ESCRT-III filaments can bind the membrane with two different orientations and form  
182 membrane structures with complex curvatures (Fig. 2H).

183

184

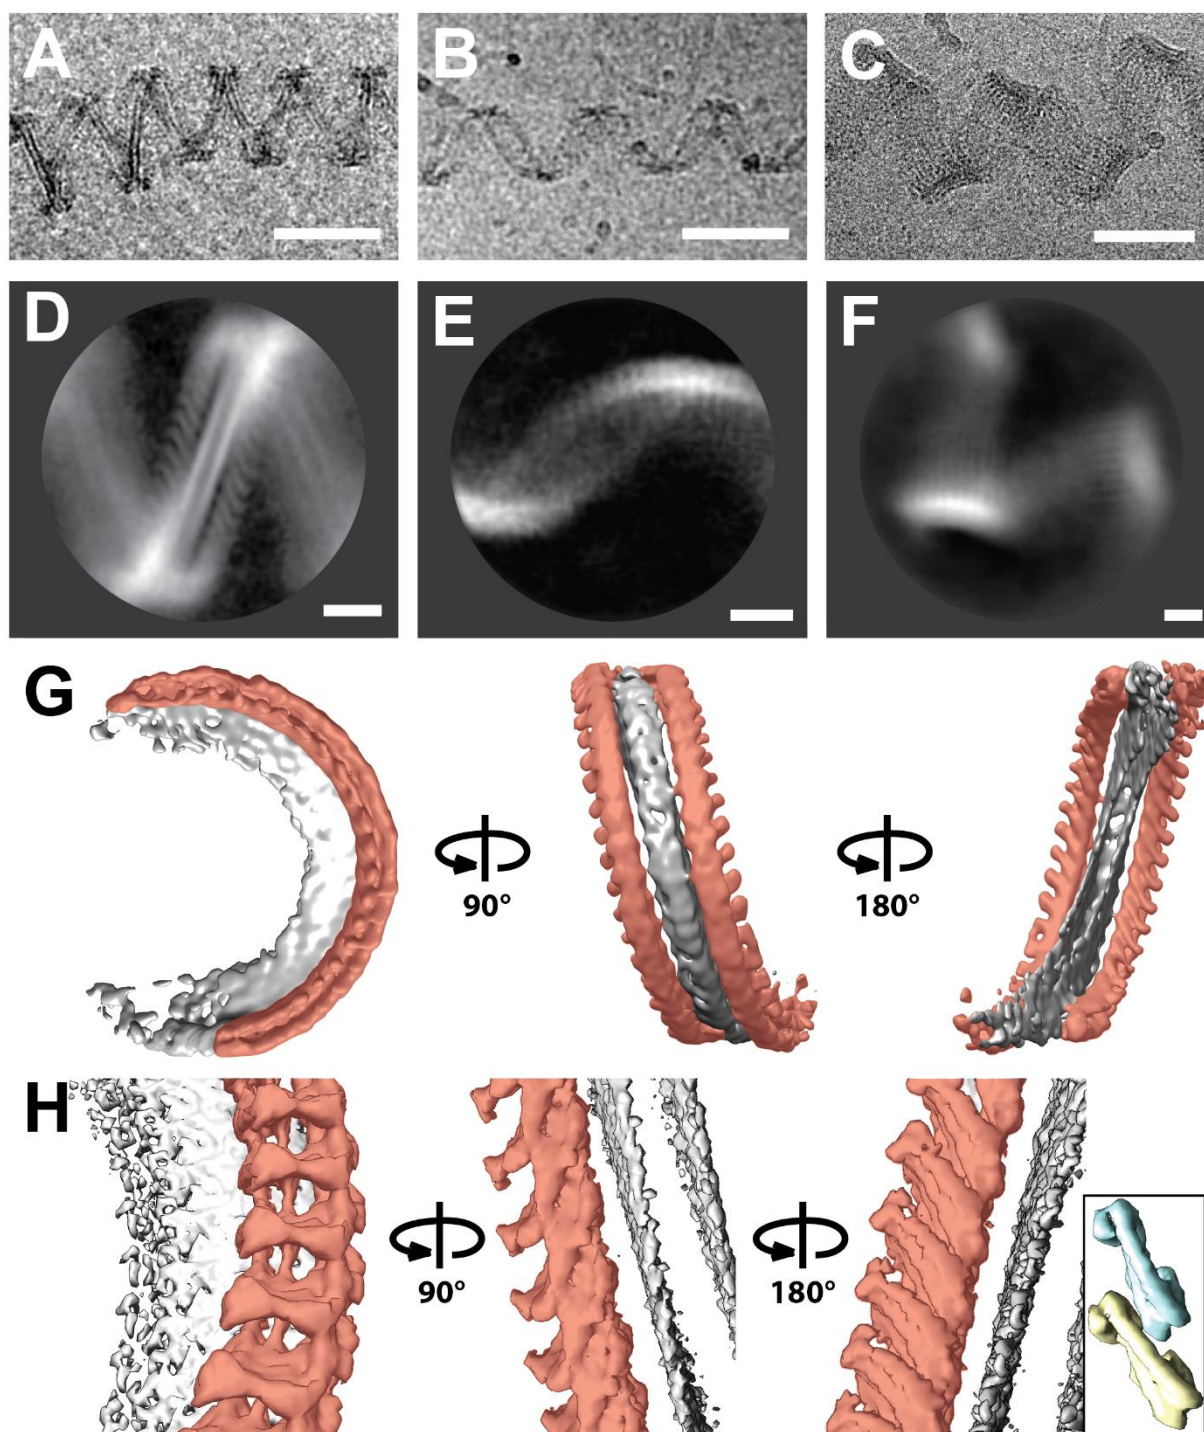

186 **Fig. 3: Organization of tube-less ESCRT-III filaments.** Electron micrographs (A-C, scale  
187 bars 100 nm) and 2D class averages (D-F, scale bars 10 nm) showing different tube-less, helical  
188 ESCRT-III filament bundles formed upon detergent removal. The majority of ribbons adopted  
189 a zigzag shape (A, D), others appeared sinusoidal (B, E) and a third set consisted of helical  
190 ribbons with higher strand numbers (C, F). (G) Unmasked 3D average of (A, D) shows that the  
191 center of the ribbon is a helical bicelle with its plane perpendicular to the tube axis (grey). There  
192 are two anti-parallel double-stranded filaments on both sides of the bicelle (red). (H) 3D average  
193 as in (A, C) with an asymmetric mask that included only one double-stranded filament (red).  
194 Inset: scale-matched densities corresponding to two closed-conformation IST1 subunits from  
195 EMD-6461 (6) are shown for comparison.

196 To understand how ESCRT-III filaments and the membrane influence each other's  
197 conformation, we developed a mathematical model that describes the competition between  
198 filament and membrane rigidities, membrane tension and filament-membrane binding energy  
199 (Supplementary Information). In a first approach, we considered a helical scaffold of fixed  
200 geometry (consistent with the modest – less than 20% – deformation induced by the addition  
201 of membrane). Adding the membrane to this scaffold, we parametrized the energy difference  
202 between filament binding modes by an energy  $\mu$  per unit filament length, where  $\mu > 0$  promotes  
203 polar filaments over equatorial ones and thus favors helical tubes (Fig. 4A). Indeed, straight  
204 tubes are coated only by equatorial filaments. We found that helical tubes are always favored  
205 at high membrane tension  $\sigma$ , and that lowering the tension leads to an increase of the membrane  
206 tube radius  $r$ , with different effects as a function of the value of  $\mu$ . For high values of  $\mu$  helical  
207 tubes remain stable at all  $\sigma$ . For lower values of  $\mu$ ,  $r$  increases significantly before reaching a  $\mu$ -  
208 dependent critical value  $r_c$  where the system transitions to a straight tube (Fig. 4B). As a result,  
209 radii larger than  $r_c$  cannot occur, and the observation of relatively thick tubes with  $r_{exp} = 12.1$   
210 nm thus implies that  $\mu \geq \mu_s^{min} = 26 \text{ pN}$  (Fig. 4A). This corresponds to a Snf7/Vps24/Vps2  
211 binding energy difference of  $2 k_B T$  per monomer, a value compatible the previously estimated  
212 membrane-binding energy of Snf7 polymers alone (about  $4 k_B T$  per monomer (5)).

213 We used the magnitude of the deformation of the Snf7/Vps24/Vps2 filaments in the  
214 presence of the membrane to infer their mechanical rigidities as well as  $\mu$ . Using the more  
215 detailed filament geometry (Fig. 4C), we endowed the Snf7/Vps24/Vps2 filaments with  
216 bending and torsional rigidities, with the former being characterized by the filament persistence  
217 length  $l_p$ . We found that the differences in filament radii and pitch observed as a function of the  
218 presence (Fig. 2) or absence (Fig. 3) of membrane imply that  $l_p \geq l_p^{min} = 114 \text{ nm}$ , and  $\mu \geq 5$   
219  $k_B T/\text{monomer}$ , slightly larger than the lower bound on  $\mu$  derived above, implying that helical  
220 tubes are more favorable than straight ones in the whole range of predicted rigidities. Another  
221 possible estimate was obtained by setting  $l_p^{Snf7} = 250 \text{ nm}$  (5) for Snf7-only filaments. This  
222 implies a torsional stiffness of  $45 \text{ nm } k_B T$ , comparable to that of DNA at low tension (19), as  
223 well as a differential binding energy of  $\mu = 15 k_B T/\text{monomer}$ , suggesting that Vps24 and Vps2  
224 may be significant contributors of the binding of ESCRT-III filaments to lipid membranes.

225



226

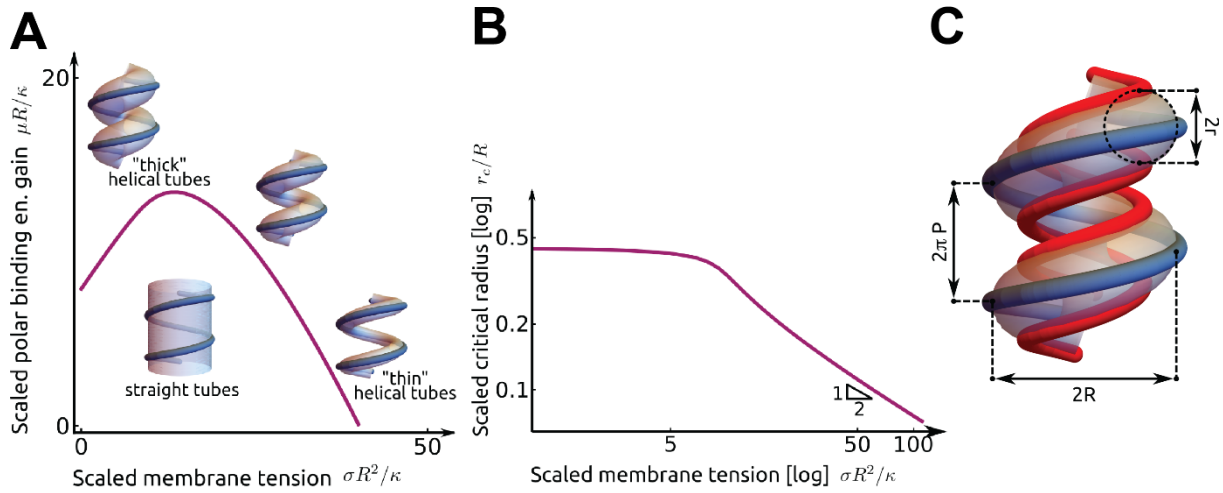

227

228 **Fig. 4: Mathematical modeling of helical tubes' mechanical equilibrium.** (A) Phase diagram  
229 showing the energetically favored shape between straight and helical tubes, as a function of  
230 energy gain  $\mu$  associated with helical tubes with membrane tension  $\sigma$ . The solid purple line is  
231 the phase boundary. (B) Critical radius  $r_c$  of the tube at the transition from straight to helical as  
232 a function of surface tension  $\sigma$ . (C) Schematic of the more detailed filament elasticity model,  
233 which clusters together the filaments bound in the equatorial (blue) and polar modes (red).

234

235 Our findings support the hypothesis that the assembly of multiple strands of ESCRT-III  
236 triggers a buckling transition. Increasing filament torsional rigidity, in addition to bending  
237 rigidity (5), could trigger the buckling transition. In this case, the filament in the flat spiral  
238 would be pre-constrained (no torsion), and the increase of its torsional rigidity when it pairs  
239 with additional strands would allow the new composite filament to adopt a conformation closer  
240 to its preferred torsion (helical). Under these circumstances, a buckling transition could be  
241 possible with a lower number of ESCRT-III subunits, with compositional heterogeneity,  
242 explaining why our previous model (5) requires more subunits than are found at sites of  
243 intraluminal vesicle formation (20).

244 Considering the helical path of ESCRT-III assemblies, structural studies have identified  
245 several membrane-interacting surfaces on the inside (6) and the outside (16) of the helix, and  
246 we identify here a third surface perpendicular to those. This may reveal a more complex picture  
247 of the filament shape transition involved in membrane deformation. If ESCRT-III subunits  
248 change their membrane-binding interface during their deformation, this could allow a filament  
249 to roll on the membrane and generate torque along the filament axis as another source of  
250 membrane strain.

251 Shape buckling and torque may originate from subunits from the leading strand being  
252 exchanged by different subunits that bind the membrane with a different preferred orientation.  
253 We have shown that subunit turnover, and incorporation of different subunits are both necessary  
254 for ESCRT-III-mediated membrane (11, 21). Additionally, or alternatively, the formation of a  
255 secondary membrane-binding filament parallel to the leading strand (11) could change the  
256 membrane-binding interface orientation, forcing the membrane to adopt a tubular shape.  
257 Unfortunately, our data did not allow us to establish whether polar and equatorial binding  
258 modes reflect different heteropolymer stoichiometries or different conformations of the same  
259 proteins forming the heteropolymer.

260 Whereas bending and torsional rigidity define the helical nature of our tube-less  
261 ESCRT-III filaments, the shape of the helical membrane tube is inherently different. The helical  
262 tube is, therefore, the result of a competition between the scaffold shape and the membrane  
263 properties, particularly membrane tension. Though membrane forces probably also affect the  
264 geometries of other protein scaffolds, we show here a first semi-rigid scaffold whose geometry  
265 is significantly affected by membrane properties.

266 **References and Notes:**

- 267 1. J. Schoneberg, I. H. Lee, J. H. Iwasa, J. H. Hurley, Reverse-topology membrane  
268 scission by the ESCRT proteins. *Nat Rev Mol Cell Biol* **18**, 5-17 (2017).
- 269 2. Q. T. Shen *et al.*, Structural analysis and modeling reveals new mechanisms governing  
270 ESCRT-III spiral filament assembly. *J Cell Biol* **206**, 763-777 (2014).
- 271 3. W. M. Henne, N. J. Buchkovich, Y. Zhao, S. D. Emr, The endosomal sorting complex  
272 ESCRT-II mediates the assembly and architecture of ESCRT-III helices. *Cell* **151**,  
273 356-371 (2012).
- 274 4. S. Lata *et al.*, Helical structures of ESCRT-III are disassembled by VPS4. *Science*  
275 **321**, 1354-1357 (2008).
- 276 5. N. Chiaruttini *et al.*, Relaxation of Loaded ESCRT-III Spiral Springs Drives  
277 Membrane Deformation. *Cell* **163**, 866-879 (2015).
- 278 6. J. McCullough *et al.*, Structure and membrane remodeling activity of ESCRT-III  
279 helical polymers. *Science* **350**, 1548-1551 (2015).
- 280 7. P. I. Hanson, R. Roth, Y. Lin, J. E. Heuser, Plasma membrane deformation by circular  
281 arrays of ESCRT-III protein filaments. *J Cell Biol* **180**, 389-402 (2008).
- 282 8. A. G. Cashikar *et al.*, Structure of cellular ESCRT-III spirals and their relationship to  
283 HIV budding. *Elife* **3**, (2014).
- 284 9. M. Lenz, D. J. Crow, J. F. Joanny, Membrane buckling induced by curved filaments.  
285 *Physical review letters* **103**, 038101 (2009).
- 286 10. S. Banjade, S. Tang, Y. H. Shah, S. D. Emr, Electrostatic lateral interactions drive  
287 ESCRT-III heteropolymer assembly. *Elife* **8**, (2019).
- 288 11. B. E. Mierzwa *et al.*, Dynamic subunit turnover in ESCRT-III assemblies is regulated  
289 by Vps4 to mediate membrane remodelling during cytokinesis. *Nat Cell Biol* **19**, 787-  
290 798 (2017).
- 291 12. N. Chiaruttini, A. Roux, Dynamic and elastic shape transitions in curved ESCRT-III  
292 filaments. *Curr Opin Cell Biol* **47**, 126-135 (2017).
- 293 13. I. Tsafirir, M. A. Guedeau-Boudeville, D. Kandel, J. Stavans, Coiling instability of  
294 multilamellar membrane tubes with anchored polymers. *Phys Rev E Stat Nonlin Soft*  
295 *Matter Phys* **63**, 031603 (2001).
- 296 14. J. Fierling, A. Johner, I. M. Kulic, H. Mohrbach, M. M. Muller, How bio-filaments  
297 twist membranes. *Soft Matter* **12**, 5747-5757 (2016).

- 298 15. M. M. Kozlov, H. T. McMahon, L. V. Chernomordik, Protein-driven membrane  
299 stresses in fusion and fission. *Trends in biochemical sciences* **35**, 699-706 (2010).
- 300 16. S. Tang *et al.*, Structural basis for activation, assembly and membrane binding of  
301 ESCRT-III Snf7 filaments. *Elife* **4**, (2015).
- 302 17. B. J. McMillan *et al.*, Electrostatic Interactions between Elongated Monomers Drive  
303 Filamentation of Drosophila Shrub, a Metazoan ESCRT-III Protein. *Cell reports* **16**,  
304 1211-1217 (2016).
- 305 18. M. Bajorek *et al.*, Structural basis for ESCRT-III protein autoinhibition. *Nat Struct*  
306 *Mol Biol* **16**, 754-762 (2009).
- 307 19. F. Kriegel *et al.*, Probing the salt dependence of the torsional stiffness of DNA by  
308 multiplexed magnetic torque tweezers. *Nucleic acids research* **45**, 5920-5929 (2017).
- 309 20. M. A. Y. Adell *et al.*, Recruitment dynamics of ESCRT-III and Vps4 to endosomes  
310 and implications for reverse membrane budding. *Elife* **6**, (2017).
- 311 21. A.-K. Pfitzner, V. Mercier, A. Roux, Vps4 triggers sequential subunit exchange in  
312 ESCRT-III polymers that drives membrane constriction and fission. *submitted*.

313 **Acknowledgments:** The authors would like to thank Alexander Myasnikov, Arthur Melo and  
314 Wim Hagen for help with electron microscopy data collection and processing. **Funding:** The  
315 tomography data collection was funded through iNEXT EM HEDC (PID: 6073). JMF  
316 acknowledges funding through an EMBO Long-Term Fellowship (ALTF 1065-2015), the  
317 European Commission FP7 (Marie Curie Actions, LTFCOFUND2013, GA-2013-609409)  
318 and a Transitional Postdoc fellowship (2015/345) from the Swiss SystemsX.ch initiative,  
319 evaluated by the Swiss National Science Foundation. AR acknowledges funding from the  
320 Swiss National Fund for Research Grants N°31003A\_130520, N°31003A\_149975 and  
321 N°31003A\_173087, and the European Research Council Consolidator Grant N° 311536. AR  
322 thanks the NCCR Chemical Biology for constant support during this project. LB is supported  
323 by the "IDI 2015" project funded by the IDEX Paris-Saclay, ANR-11-IDEX-0003-02. ML  
324 acknowledges support by ANR grant ANR-15-CE13-0004-03 and ERC Starting Grant  
325 677532. ML's group belongs to the CNRS consortium CellTiss. The UCSF Center for  
326 Advanced CryoEM is supported by NIH grants S10OD020054 and 1S10OD021741 and the  
327 Howard Hughes Medical Institute (HHMI). I.J. was funded by a graduate research fellowship  
328 from the National Science Foundation (1000232072) and a Mortiz-Heyman Discovery  
329 Fellowship. AF is supported by an HHMI Faculty Scholar grant, the American Asthma  
330 Foundation, the Chan Zuckerberg Biohub, NIH/NIAID grant P50 AI150464-13 and

331 NIH/NIGMS grant 1R01GM127673-01. **Author contributions:** Conception and design:  
332 JMvF and AR; data acquisition, analysis and interpretation: JMvF, LB, NT, IJ, AF, ML and  
333 AR; theoretical model: LB and ML; writing (original draft): JMvF, LB, ML and AR; writing  
334 (review and editing): JMvF, LB, NT, IJ, AF, ML and AR **Competing interests:** The authors  
335 declare no competing interests. **Data and materials availability:** All data needed to evaluate  
336 the conclusions in this paper are presented here or in the supplementary materials. Structural  
337 data is available from the Electron Microscopy Data Bank, accession numbers for electron  
338 density maps are EMD-10136, EMD-10137, EMD-10138 and EMD-10138.

339

340 **Supplementary Materials:**

341 Materials and Methods

342 Supplementary Mathematical Modeling

343 Figures S1-S3

344 Movies S1-S2.

345

346

347
